# Supplementary material for: CRISPR/Cas9 cleavage of viral DNA efficiently suppresses hepatitis B virus
Source: PubMed Central journal article supplement (PMC4649911; doi:10.1038/srep10833), 2015-06-02
Supplement: srep10833-s1.pdf [file srep10833-s1.pdf]

1 **CRISPR/Cas9 cleavage of viral DNA efficiently suppresses hepatitis B virus**

2 **Authors:** Vyas Ramanan<sup>1, †</sup>, Amir Shlomai<sup>2,12 †</sup>, David B.T. Cox<sup>1,6,9, †</sup>, Robert E. Schwartz<sup>1,3,4</sup>,  
3 Eleftherios Michailidis<sup>2</sup>, Ankit Bhatta<sup>2</sup>, David A. Scott<sup>6,11</sup>, Feng Zhang<sup>1,6,10,11\*</sup>, Charles M.  
4 Rice<sup>2,\*</sup>, Sangeeta N. Bhatia<sup>1,3,5,6,7,8,\*</sup>

5 **Affiliations:**

6 <sup>1</sup>Department of Health Sciences and Technology, Massachusetts Institute of Technology,  
7 Cambridge, MA 02139, USA.

8 <sup>2</sup>Laboratory of Virology and Infectious Disease, Center for the Study of Hepatitis C, The  
9 Rockefeller University, New York, NY 10065, USA.

10 <sup>3</sup>Department of Medicine, Brigham and Women's Hospital, Boston, MA 02115, USA.

11 <sup>4</sup>Division of Gastroenterology and Hepatology, Weill Cornell Medical College, New York, NY  
12 10065, USA.

13 <sup>5</sup>Department of Electrical Engineering and Computer Science, Massachusetts Institute of  
14 Technology, Cambridge, MA 02139, USA.

15 <sup>6</sup>Broad Institute, Cambridge, MA 02139, USA.

16 <sup>7</sup>Howard Hughes Medical Institute, Cambridge, MA 02139, USA.

17 <sup>8</sup>Koch Institute for Integrative Cancer Research, Massachusetts Institute of Technology,  
18 Cambridge, MA 02139, USA.

19 <sup>9</sup>Department of Biology, Massachusetts Institute of Technology, Cambridge, MA 02139

20 <sup>10</sup>Department of Brain and Cognitive Sciences, Massachusetts Institute of Technology,  
21 Cambridge, MA 02139

22 <sup>11</sup>McGovern Institute for Brain Research, Massachusetts Institute of Technology, Cambridge,  
23 MA 02139

1

2 <sup>12</sup>Current address: The Liver Institute, Rabin Medical Center, Beilinson hospital and the Sackler

3 Faculty of Medicine, Tel-Aviv University, Tel-Aviv, Israel

4 †These authors contributed equally to the work

## 5 **Supplementary Materials**

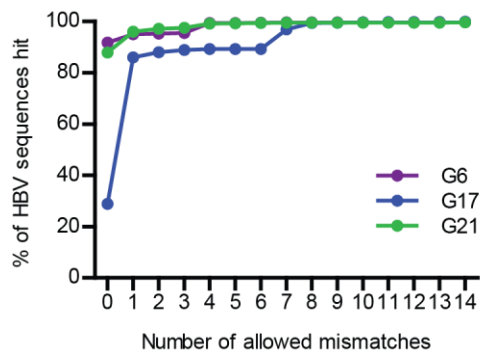

6

7 **Figure S1: Guide RNAs targeting conserved regions target large majority of patient-**

8 **derived virus genomes.** All whole-genome sequences from HBV isolates were queried from

9 GenBank to determine the conservation of 23 nt target sequence (20 nt spacer + 3 nt PAM) for 3

10 guides (6, 17, and 21). x-axis denotes number of allowed mismatches, and y-axis denotes the

11 percentage of sequenced isolates that fall within this number of mismatches to native sgRNA

12 target site.

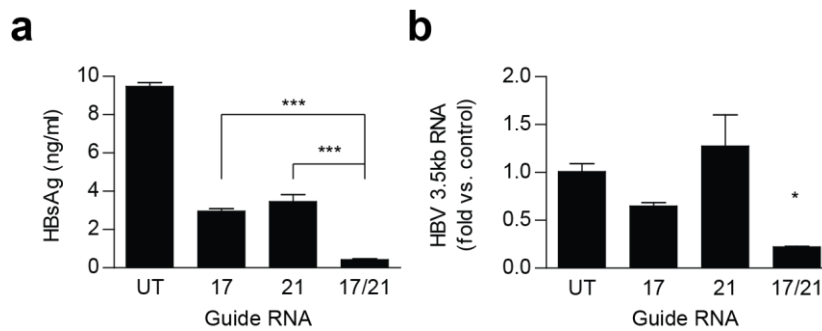

13

1 **Figure S2: Multiplex targeting of HBV improves antiviral potency of CRISPR/Cas9.**  
2 HepG2 cells were co-transfected with 1.3x WT HBV and sgRNA/Cas9-2A-mCherry construct,  
3 where the sgRNA is an untargeted control (UT), sg17, sg21, or a combination of sg17 and sg21.  
4 The combination of sg17 and sg21 reduces (a) HBsAg production and (b) HBV 3.5kb RNA  
5 relative to single targeting with sg17 and sg21. \* $p < 0.05$  vs. all other groups, \*\*\* $p < 0.001$  vs.  
6 indicated groups.

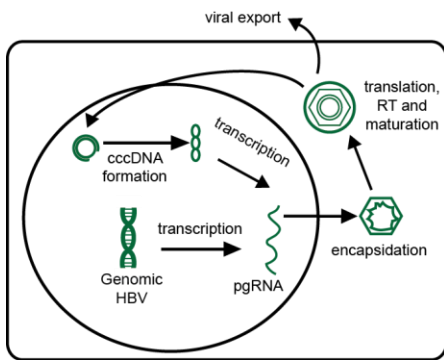

8  
9 **Figure S3: The HBV life cycle within HepG2.2.15 cells.** HepG2.2.15 cells contain genomically  
10 integrated linear 1.3x WT HBV sequences, from which viral proteins and cccDNA are  
11 constitutively produced via transcription followed by translation (proteins) or reverse  
12 transcription and nuclear re-import (cccDNA). The persistent HBV production in this system

1 enables us to assay the long-term anti-HBV effects of CRISPR/Cas systems targeting viral DNA.

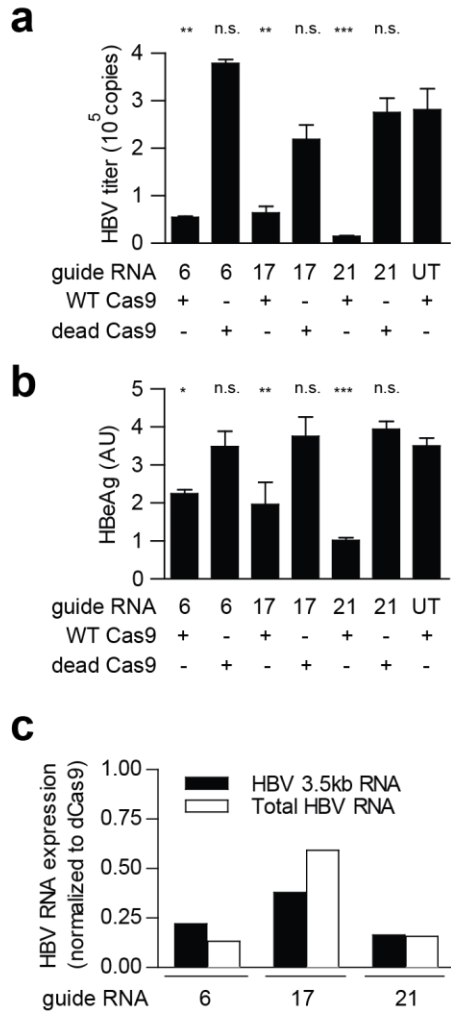

2

3 **Figure S4: HBV products are reduced upon long-term CRISPR/Cas expression.** Stable lines

4 of HepG2.2.15 cells expressing 3 different on-target guides with nuclease-active or nuclease-

5 dead Cas9, along with 3 non-HBV targeting guides, were seeded at consistent cell densities

6 (20,000 cells/cm<sup>2</sup>) and allowed to secrete virions and viral proteins into the supernatant. 72h

7 later, supernatant was collected and (a) viral titer and (b) HBeAg (a secreted protein produced

8 from the C ORF, used clinically as a marker of active viral replication) were quantified. UT

9 stands for untargeted guides, where scrambled sgRNAs were used instead of those targeting

10 HBV. (c) Total HBV RNA and 3.5kb RNA (consisting of pregenomic RNA and the longest

1 translated HBV RNA species, which are difficult to distinguish) were quantified at 36 days post  
2 transduction, with HBV RNA suppression continuing out to this late time point. (a-b) \* $p < 0.05$   
3 vs. UT; \*\* $p < 0.01$  vs. UT; \*\*\* $p < 0.001$  vs. UT as assessed by one-way ANOVA followed by  
4 Dunnett's post-hoc test.

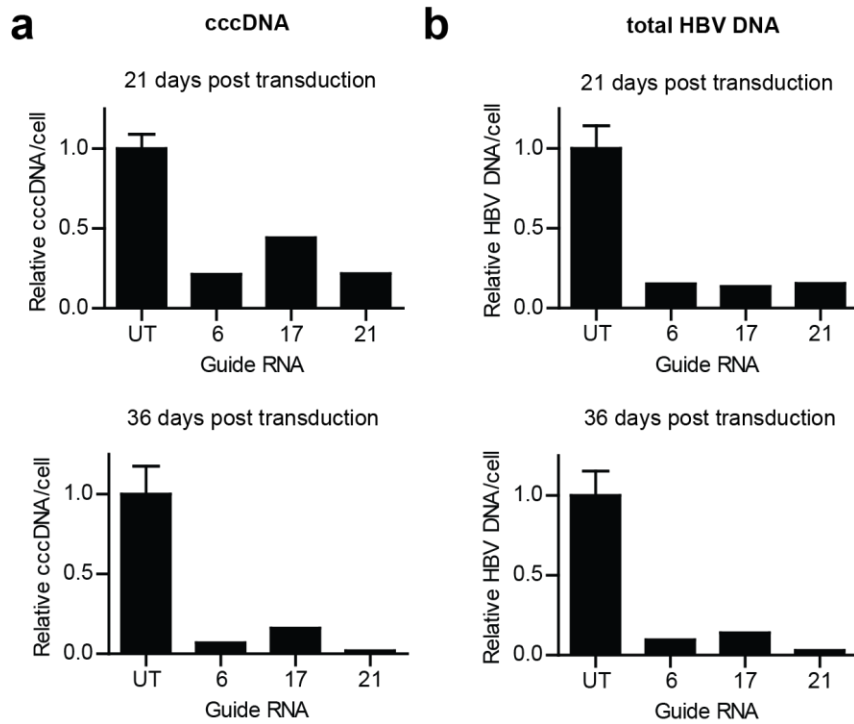

5  
6 **Figure S5: HBV DNA and cccDNA reductions upon long-term CRISPR/Cas expression are**  
7 **produced with multiple guides.** (a) cccDNA reductions at 21 and 36 days post transduction  
8 across 3 guides (6, 17, and 21); large reductions are seen in each. (b) Total HBV DNA reductions  
9 at 21 and 36 days post transduction are also large across these 3 guide RNAs.

36 days post transduction

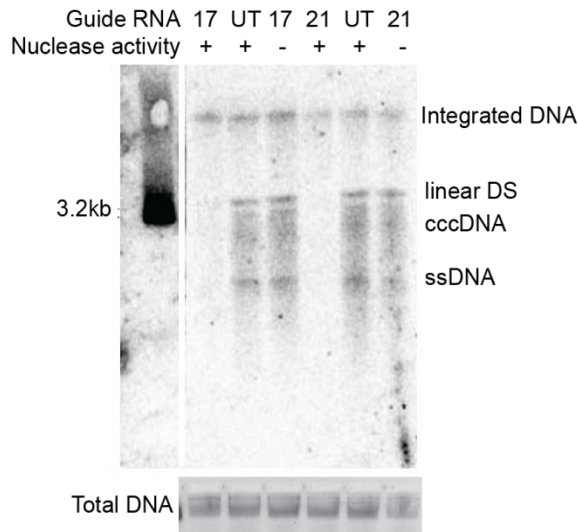

1

2 **Figure S6: Southern blot analysis confirms that CRISPR-mediated reduction in viral DNA**  
3 **is specific for nonintegrated forms.** At 36 days post transduction, DNA was isolated from  
4 HepG2.2.15 cells transduced with guide 17 or 21 or appropriate controls and a Southern blot was  
5 performed to detect HBV DNA. Comparing lanes 1 and 4 to the control lanes, it is clear that  
6 cccDNA and free linear double- and single-stranded HBV DNA are dramatically decreased,  
7 while the chromosomally integrated HBV DNA remains intact.

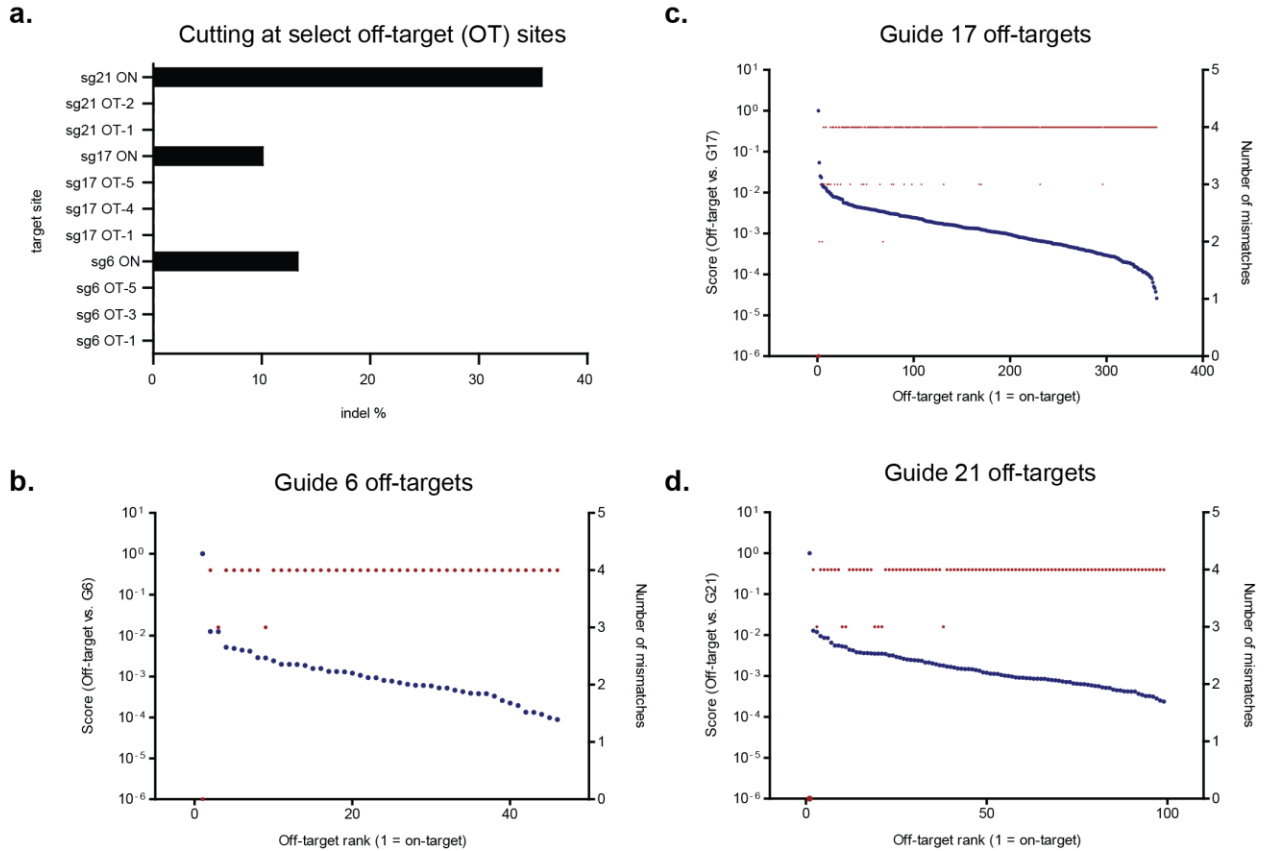

1  
2 **Figure S7: Lack of off-target effects at predicted potential off-target sites.** (a) Viral and  
3 human genomic sequences around computationally predicted on-target and off-target sites were  
4 amplified from HepG2.2.15 cells that were lentivirally transduced with CRISPR/Cas9 constructs  
5 at over 4 weeks post transduction. Amplicons were deep sequenced to determine indel generation  
6 at off-target sites, and no indels were captured in any of the 8 off-target sites measured (with on-  
7 target indel fraction between 10-36%. (b-d) Computationally predicted off-targets for guides sg6,  
8 sg17, and sg21 with off-target rank on x axis and computationally determined off-target score  
9 (blue) and number of mismatches (red) on y axis.

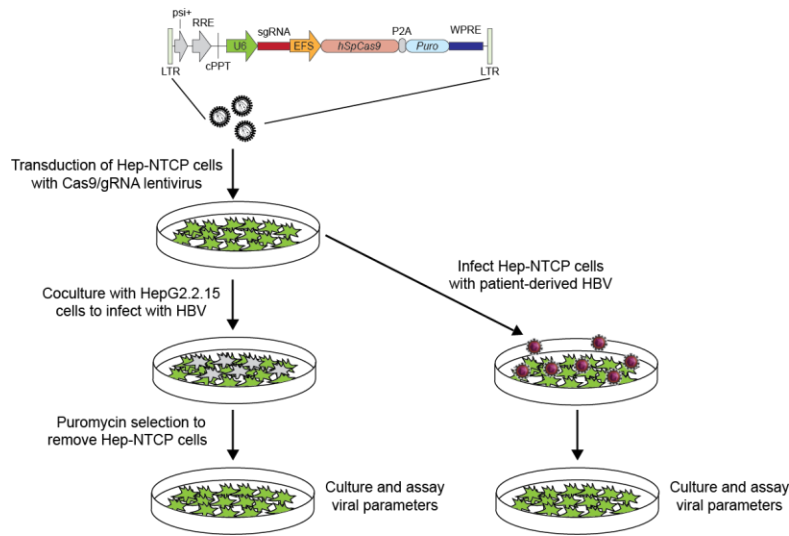

1

2 **Figure S8: Schematics for *de novo* infection experiments.** Hep-NTCP cells were transduced

3 with Cas9/gRNA constructs containing either g17 or g17M (mutant of g17, resulting in 5bp

4 DNA bulge upon complexation to HBV DNA target), and either WT or dead Cas9, and then

5 selected with puromycin to generate stable lines. (Left) These cells were seeded in coculture with

6 HepG2.2.15 cells, which produce infectious HBV virions that then infect the transduced Hep-

7 NTCP cells. After transient coculture, HepG2.2.15 cells were killed by puromycin selection, and

8 Hep-NTCP cells were cultured for several days and then harvested to assay viral parameters.

9 (Right) These cells were infected with HBV virions derived from HBV+ patient plasma, then

10 cultured and harvested to assay viral parameters.



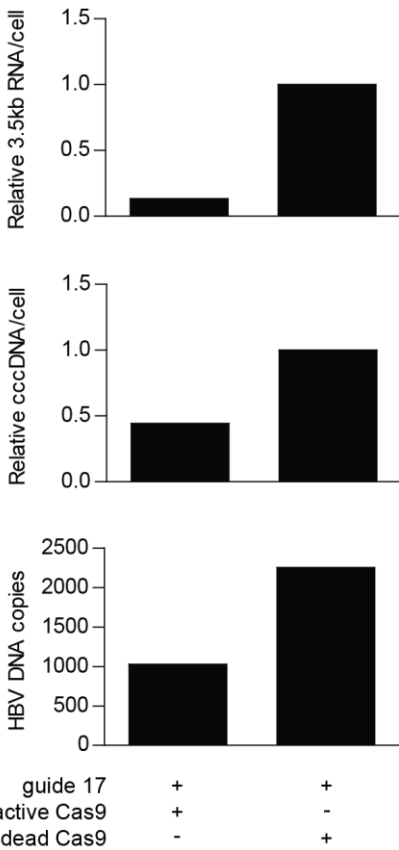

|   |             |   |   |
|---|-------------|---|---|
| 1 | guide 17    | + | + |
|   | active Cas9 | + | - |
|   | dead Cas9   | - | + |

2 **Figure S9: CRISPR/Cas-mediated disruption of HBV in patient-derived virus model**

3 **system.** Hep-NTCP cells (See Methods) were infected with HBV from infected patient serum  
 4 upon transduction of guide 17 and active or nuclease-dead Cas9. 9 days after infection, the cells  
 5 were harvested and viral products were quantified. Nuclease-active Cas9 caused decreases in  
 6 HBV 3.5kb RNA, cccDNA, and total DNA levels.

7 **Table S1: Target sequences against HBV genome**

| sgRNA | Target sequence (20 nt) |
|-------|-------------------------|
| 1     | GACTTCTCTCAATTTTCTAG    |
| 2     | GTTGGTGAGTGATTGGAGGT    |
| 3     | GGCATAGCAGCAGGATGAAG    |
| 4     | GGCTTTCGAAAATTCCTAT     |
| 5     | GCTGCCAACTGGATCCTGCG    |
| 6     | GGGGCGCACCTCTCTTTACG    |
| 7     | GAAGCGAAGTGCACACGGTC    |

8 GCAGAGGTGAAAAAGTTGCA  
9 GTTGATAGGATAGGGGCATT  
10 GTCGCAGAAGATCTCAATCT  
11 GCCTGCTAGGTTTTATCCAA  
12 GGAACAAGATCTACAGCATG  
13 GGCGAGGGAGTTCTTCTTCT  
14 GACCTTCGTCTGCGAGGCGA  
15 CCTCCAAGCTGTGCCTTGGG  
16 ATCGACCCTTATAAAGAATT  
17 TAAAGAATTTGGAGCTACTG  
18 CCCGTCGGCGCTGAATCCTG  
19 GGGTTGCGTCAGCAAACACT  
20 TTTGCTGACGCAACCCCCAC  
21 TCCTCTGCCGATCCATACTG  
22 CCGCTTGTTTTGCTCGCAGC  
23 AACCCCCACTGGCTGGGGCT  
24 CCTGCTGCGAGCAAAACAAG

1

2 **Table S2: Primers used for *Surveyor* Assay**

3 Guide 6-F: TATCCATGGCTGCTAGGCTG

4 Guide 6-R: AGTCAGAAGGCAAAAACGAGAG

5 Guide 17-F1: TATCCATGGCTGCTAGGCTG

6 Guide 17-R1: AGGGGCATTTGGTGGTC

7 Guide 17-F2: AAATTGGTCTGCGCACCAGC

8 Guide 17-R2: AGGTCTCTAGATGCTGGATCTTCC

9 Guide 21-F1: GGTTATCCTGCGTTAATGCCC

10 Guide 21-R1: GTCCGCGTAAAGAGAGGTG

11 Guide 21-F2: TGAACCTTTACCCCGTTGCCC

12 Guide 21-R2: AGAGAGTCCCAAGCGACCCC

13

14
